# **A laboratory demand optimisation project in primary care**

**Magda Bucholc<sup>1</sup>, Maurice O’Kane<sup>2</sup>, Brendan O’Hare<sup>3</sup>, Ciaran Mullan<sup>3</sup>, Paul Cavanagh<sup>3</sup>, Siobhan Ashe<sup>2</sup>, KongFatt Wong-Lin<sup>1</sup>**

<sup>1</sup> Intelligent Systems Research Centre, University of Ulster, Magee Campus, Londonderry BT48 7JL, Northern Ireland, UK

<sup>2</sup> Altnagelvin Area Hospital, Western Health and Social Care Trust, Glenshane Road, Londonderry BT47 6SB, Northern Ireland, UK

<sup>3</sup> Western Local Commissioning Group, Gransha Park House, Clooney Road, Londonderry BT 47 6FN, Northern Ireland, UK

Correspondence to

Dr Magda Bucholc

Email: [bucholc-m@email.ulster.ac.uk](mailto:bucholc-m@email.ulster.ac.uk)

## 1 **Abstract**

2 **Background:** There is evidence of increasing use of laboratory tests with  
3 substantial variation between clinical teams which is difficult to justify on clinical  
4 grounds. The aim of this project was to assess the effect of a demand  
5 optimisation intervention on laboratory test requesting in primary care.

6 **Methods:** The intervention comprised educational initiatives, feedback to 55  
7 individual practices on test request rates with ranking relative to other practices,  
8 and a small financial incentive for practices to engage and reflect on their test  
9 requesting activity. Data on test request numbers were collected from the  
10 laboratory databases for consecutive 12 month periods; pre-intervention 2011-  
11 12, intervention 2012-13, 2013-14, 2014-15, and post-intervention 2015-16.

12 **Results:** The intervention was associated with a 3.6% reduction in the mean  
13 number of profile test requests between baseline and 2015-16, although this  
14 was seen only in rural practices. In both rural and urban practices, there was a  
15 significant reduction in-between practice variability in request rates. The mean  
16 number of HbA<sub>1c</sub> requests increased from 1.9 to 3.0 per practice patient with  
17 diabetes. Variability in HbA<sub>1c</sub> request rates increased from 23.8% to 36.6%. At  
18 all considered time points, test request rates and variability were higher in rural  
19 than in urban areas.

20 **Conclusions:** The intervention was associated with a reduction in both the  
21 volume and between practice variability of profile test requests, with differences  
22 noted between rural and urban practices. The increase in HbA<sub>1c</sub> requests may

23 reflect a more appropriate rate of diabetes monitoring and also the adoption of  
24 HbA<sub>1c</sub> as a diagnostic test.

25

26 **Keywords:** laboratory test; test request variability; clinical intervention; clinical  
27 pathology; primary care

28

### 29 **Strengths & limitations of the study**

30

- 31 • We assessed the effect of a laboratory demand optimisation intervention  
32 both on the value and between GP practice variability in laboratory test  
33 requesting.
- 34 • The changes in laboratory test requesting were separately evaluated for  
35 rural and urban GP practices.
- 36 • Other factors (GP practice organisation, characteristics of general  
37 practitioners) potentially affecting between practice differences in  
38 laboratory test ordering were not taken into account due to data  
39 unavailability.
- 40 • The demand management initiative was not accompanied by the cost-  
41 effectiveness analysis.
- 42 • The demand optimisation intervention was conducted in a Northern  
43 Ireland (NI) Western Health and Social Care Trust and the findings have  
44 not been independently replicated in any other NI trusts.

## 45 **Introduction**

46 Despite the important role of laboratory testing in the diagnosis and monitoring  
47 of disease, there is concern about the increasing use of laboratory tests and in  
48 particular, the substantial variation in test ordering rates between clinical teams  
49 [1]. In the UK laboratory test requests increased by approximately 5% per year  
50 in the period 2012-15 [2]. While it is difficult to specify for most tests what an  
51 'appropriate' test request rate might be for a given patient population, it is  
52 probable that variability in test ordering rates reflects both inappropriate over-  
53 and under-requesting [3,4]. Several studies have suggested that around 25-  
54 40% of test requests may be unnecessary [5,6], and do not contribute to patient  
55 management. This may reflect a lack of knowledge about the appropriate use of  
56 individual tests, the use of different clinical guidelines and protocols, inability to  
57 access previous results or defensive behaviour of physicians due to fear of  
58 errors and medical malpractice litigation [7-10]. Unnecessary testing is not only  
59 wasteful of resources but impacts on patients directly through the requirement  
60 for venepuncture and the follow up of minor (and possibly insignificant)  
61 abnormalities detected and which may cause patient anxiety. Inappropriate  
62 under requesting may cause harm through failure to diagnose or manage  
63 disease optimally.

64 Various demand optimisation interventions have been proposed to encourage  
65 more appropriate laboratory testing and include educational initiatives on the  
66 role and limitations of individual tests and appropriate retest intervals [11-14],  
67 [15], feedback on test usage [16-19], redesigning of laboratory tests request

68 forms [20], the introduction of locally agreed clinical guidelines [21,22] and  
69 prompts on electronic test ordering systems. The effectiveness of such  
70 interventions is variable and depends in part on local factors and local clinical  
71 team engagement. Furthermore, such interventions may be time consuming  
72 and expensive; a study on educational interventions conducted in hospital  
73 settings showed that the savings on the direct hospital costs resulting from  
74 interventions were smaller than the cost of interventions [23].

75 The aim of this study was to investigate the effect of a laboratory demand  
76 optimisation intervention in a primary care setting on both laboratory test  
77 request rates and on the variability between practices in test request rates.

## 78 **Materials and methods**

79 This study was undertaken in 55 separate primary care medical practices within  
80 the catchment area of the Western Health and Social Care Trust (WHSCT).  
81 The WHSCT provides laboratory services to these practices with networked  
82 laboratories in each of the three large urban centres of Londonderry, Omagh,  
83 and Enniskillen. The patient population served by the 55 practices over the 5-  
84 year study period was 316 382 (2011-12), 316 688 (2012-13), 318 057 (2013-  
85 14), 319 383 (2014-2015), and 326 429 (2015-2016).

86 The primary care practices were situated in both rural and urban areas using  
87 data from the Census Office of the Northern Ireland Statistics and Research  
88 Agency [24]. Since the Northern Ireland settlement classification does not give  
89 continuous spans of particular area types, a practice was designated as urban if

90 its postal address was situated in a settlement of more than 10,000 residents  
91 following the urban-rural classification thresholds used by the Department for  
92 Environment, Food and Rural Affairs (DEFRA) and the Department for  
93 Communities and Local Government (DCLG) [24]. Under this definition, 31  
94 practices were designated as urban and 24 as rural.

95 Data on laboratory test requests from individual primary medical practices were  
96 studied over five consecutive 12 month periods (1 April to 31 March) from 2011-  
97 12 (the pre-intervention or 'baseline' period) to 2015-16. Test request data were  
98 extracted from the laboratory databases of the Altnagelvin Area Hospital,  
99 Tyrone County Hospital, and the Erne Hospital (subsequently the South West  
100 Acute Hospital). Information on individual primary care practices regarding  
101 registered patient numbers, the number of male patients, and patients with  
102 diabetes was obtained from the Western Health and Social Services Board  
103 Integrated Care Partnership.

104 The following test groups were studied: electrolyte profile, lipid profile, thyroid  
105 profile (FT4 and TSH), liver profile, immunoglobulin profile, glycosylated  
106 haemoglobin (HbA<sub>1c</sub>), and prostate-specific antigen (PSA). The number of  
107 profile tests (electrolyte profile, lipid profile, thyroid profile, liver profile,  
108 immunoglobulin profile) requested in each practice was standardised against  
109 the number of registered patients in the practice and expressed as requests per  
110 1000 patients. HbA<sub>1c</sub> was standardised against the number of patients with  
111 diabetes per practice while PSA was standardised against the number of male  
112 patients per practice.

113 Throughout the study period laboratory requests from primary care were  
114 ordered on a paper laboratory request form. All of the test considered here (with  
115 the exception of immunoglobulins) were listed on the request form and could be  
116 ordered by ticking a box on the test request form adjacent to the test profile  
117 name; an immunoglobulin profile was ordered by free text entry on the request  
118 form.

119 Test requesting rates were studied before and after a three year intervention  
120 designed to support optimal use of laboratory testing. The intervention package  
121 was developed in conjunction with the Western Local Commissioning Group  
122 (responsible for commissioning and managing primary care services and which  
123 included senior primary care doctors). The intervention included several  
124 discrete elements. Firstly, awareness of the intervention was promoted through  
125 educational sessions on the benefits to patients and clinical teams of optimal  
126 use of laboratory tests. Secondly, educational material was developed in  
127 conjunction with primary care clinicians which covered the major clinical  
128 indications for a range of considered requested tests and appropriate retest  
129 intervals. This was distributed to all primary care teams and was supplemented  
130 by presentations at educational meetings. Thirdly, all primary care teams were  
131 asked to engage in the process of reviewing test requesting procedures within  
132 their practice, and to reflect on the information provided on their practice test  
133 requesting rates and ranking in comparison to other practices. The active  
134 intervention took place over the three year period: 2012-13, 2013-14, and 2014-  
135 15.

136 Prior to the intervention each practice received information on its standardised  
137 test request rates (see below) over the previous year (baseline period) and its  
138 ranking in relation to standardised test request rates of all other practices  
139 served by the laboratory.

140 The Western Local Commissioning Group (WLCG) made available funding to  
141 incentivise participation in this process. All participating primary care practices  
142 received a payment of £0.30 per patient registered on their practice list to  
143 engage in the process of reviewing and reflecting on test requesting activity.  
144 Changes in the absolute numbers of standardised test requests and between-  
145 practice variability in standardised test request rates were compared to the pre-  
146 intervention ('baseline') period (April 2011 – March 2012).

147 Variability between practices in standardised test request rates was expressed  
148 as coefficient of variation (CV) whereas differences in the variance between  
149 pre- and post-intervention period were tested using the Bonett-Seier test [25].  
150 A paired t-test was used to compare mean numbers of laboratory test requests  
151 from pre- and post-intervention period.

152 Spearman's rank correlation was used to study relationships between  
153 standardised requesting rates for three of the most commonly request tests  
154 (electrolyte, liver, and lipid tests) within individual practices [26]. All statistical  
155 analyses were performed using R statistical software, version 3.3.3 (R  
156 Foundation for Statistical Computing, Vienna, Austria).

157



## 158 **Results**

159 The total number of profile test requests for all practices fell from a mean of  
160 1554 per 1000 patients pre-intervention to 1498 per 1000 patients one year  
161 post intervention (a reduction of 3.7%;  $p = 0.09$ ) (Table 1). Rural practices had  
162 a higher average standardised profile request rate than urban practices at all  
163 time points: baseline, during the intervention and at one year post intervention.  
164 However, the reduction in the mean number of test requests was seen  
165 exclusively in rural practices where requests fell by 9% ( $p = 0.01$ ) as compared  
166 with no significant change in urban practices.

167 The between practice coefficient of variation for profile test requests fell from  
168 30.2 % pre-intervention to 27.4% one year post intervention ( $p = 0.049$ ). Rural  
169 practices had a higher between practice coefficient of variation than urban  
170 practices at all time points (Table 1). There was no significant difference  
171 between urban and rural practices in the number of registered patients per  
172 general practitioner.

173 For HbA<sub>1c</sub>, there was an increase in mean test request rates from 1.9 requests  
174 per patient with diabetes pre-intervention to 3.0 diabetes post-intervention ( $p$   
175 =0.00001) (Table 2). Variability for HbA<sub>1c</sub> increased from 23.8% to 36.6% ( $p =$   
176 0.00001). The statistically significant increase in variation for HbA<sub>1c</sub> was  
177 observed both in rural ( $p = 0.00031$ ) and urban ( $p = 0.008$ ) areas (Table 2).

178 The mean number of PSA requests per 1000 male patients increased from 69.4  
179 to 82.9 following the intervention ( $p = 0.006$ ) (Table 3). However, there was no  
180 significant change in between practice variability.

181 Finally, there were high correlations within practices for individual profile test  
182 types: electrolyte and liver profiles ( $R = 0.83$ ), and lipids and liver profiles  
183 ( $R=0.67$ ) (Figure 1).

## 184 **Discussion**

185 While it may be challenging to define what represents an appropriate rate of  
186 requesting for most tests, it is certainly difficult to justify very high levels of  
187 variability between clinical teams providing care to broadly similar groups of  
188 patients within a single healthcare system. This study found high levels of  
189 baseline variability between primary care practices in standardised biochemistry  
190 profile test request rates both in rural (32.1%) and urban areas (24.7%). There  
191 is little reason to believe that there were significant differences in the  
192 characteristics of the practice patient populations within each of rural and urban  
193 areas in terms of disease prevalence or morbidity that might explain such high  
194 variability. It is therefore likely that the variability observed reflects differing  
195 behaviours and perceptions between clinical teams as to the value and role of  
196 individual tests in patient assessment.

197 The baseline standardised profile test request rates were significantly higher in  
198 rural than in urban practices. The reasons for this are unclear and were beyond  
199 the scope of investigation of the present study. However possible explanations

200 include differences in practice organisation and workflow, differences in the  
201 characteristics of general practitioners such as training, background, age which  
202 might lead to differences in approach to patient assessment and testing [27,28].

203 The intervention employed to optimise demand was associated with two effects.  
204 Firstly, there was a reduction of 3.7% in total standardised profile test requests  
205 (as measured at one year post intervention). However, this was accounted for  
206 entirely by a reduction in rural practices. Secondly, there was also a significant  
207 reduction in between practice variability in test requesting from 30.2% to 27.4%  
208 and this was seen in both urban and rural practices. During and post-  
209 intervention, the standardised test request rates and variability continued to be  
210 higher in rural than urban practices.

211 For HbA<sub>1c</sub> the standardised test rate per patient with diabetes increased from  
212 1.9 to 3 tests per patient with diabetes per year. Best practice guidelines  
213 suggest measuring HbA<sub>1c</sub> two to three times per year in patients with diabetes  
214 and this had been highlighted in the educational material that formed part of the  
215 intervention [29]. The increased testing rate may therefore reflect more  
216 appropriate monitoring of patients with diabetes. However, as it was not  
217 possible to distinguish HbA<sub>1c</sub> samples which had been requested for diabetes  
218 monitoring from those requested for the purposes of diabetes diagnosis, it is  
219 difficult to be certain. The use of HbA<sub>1c</sub> as a diagnostic test for diabetes mellitus  
220 had been introduced in 2012 i.e. during the baseline period and it is possible  
221 that the increase in requesting (and the observed increase in between practice

222 variability) reflected its adoption as a diagnostic test rather than as a monitoring  
223 test.

224 Within individual practices, there was high correlation between standardised  
225 request rates for different test profiles. The reasons for such correlations are  
226 unclear. In some instances, there may be good reasons why different test  
227 profiles should be requested together e.g. monitoring liver enzymes along with  
228 lipids for patients on statin therapy. In other cases, there may be patients with  
229 complex medical conditions and a number of co-morbidities in whom it is  
230 appropriate to request a number of test profiles simultaneously. A further  
231 possibility is that the co-requesting of different test profiles reflects a 'scatter  
232 gun' approach to test requesting. This may also have inadvertently been  
233 facilitated by the design of the test request form on which tests are requested  
234 simply by ticking a box beside the relevant test profile.

235 Previous studies on demand optimisation in primary care have yielded varying  
236 results with some studies showing reductions of up to 12% [17,19,30-32]  
237 following a range of educational and feedback interventions or guideline driven  
238 decision support systems. Studies which targeted the utilization of specific  
239 laboratory tests also showed that the interventions generally produced changes  
240 in the desired direction. For example, educational initiatives were found to  
241 improve significantly the management of albuminuria [33], oral anticoagulation  
242 [34], C-reactive protein [35], HbA<sub>1c</sub> [36-38], lipids [36-39], and Pap testing [40].  
243 The improvement was more likely to be observed when more than one type of  
244 intervention was used at a time [38,41].

245 Although numerous previous studies had documented high degrees of  
246 variability in test requesting between primary care teams [32,42,43], a unique  
247 feature of the present study was that it assessed the effect of the intervention  
248 on between practice variability in test requesting. The reduction in variability  
249 found here suggests that the intervention was associated with a more  
250 standardised approach to patient investigation and monitoring.

## 251 **Conclusions**

252 In conclusion, the demand optimisation intervention undertaken here showed a  
253 small but significant reduction in reducing unwarranted variability between  
254 practices in test requesting rates.

255

256

## 257 **Data**

258 The information on datasets supporting this article have been provided in the  
259 supplementary material.

## 260 **Competing interests**

261 We have no competing interests

## 262 **Authors' contributions**

263 Contributors: MB performed the analysis and interpretation of the results, and  
264 wrote the manuscript. She is guarantor. MJO, BOH, CM and PC designed and  
265 carried out the demand management intervention. MJO wrote the manuscript.

266 BOH, CM and PC edited the manuscript. SA monitored the data collection and  
267 edited the manuscript. KWL initiated the collaborative project, guided the data  
268 analysis and interpretation of the results, and wrote the manuscript.

## 269 **Funding**

270 This work was performed under the Northern Ireland International Health  
271 Analytics Centre (IHAC) collaborative network project funded by Invest NI  
272 through Northern Ireland Science Park (Catalyst Inc). The funder had no role in  
273 study design, data collection and analysis, decision to publish, or preparation of  
274 the manuscript.

## 275 **Acknowledgments**

276 The authors would wish to thank the IHAC collaborative network, especially  
277 Colm Hayden, Brendan Bunting and Le Roy Dowey for helpful discussions;  
278 Graham Moore, Austin Tanney, and Paul Barber for computing and technical  
279 support; and Stephen Lusty and Peter Devine for administrative support.

## References

1. Smellie WSA. Demand management and test request rationalization. *Ann Clin Biochem* 2012; 49(4): 323-36.
2. Karakusevic S, Edwards N, Lewis R, et al. The future of pathology services. 2016. Available from: <http://www.nuffieldtrust.org.uk/publications/futurepathology-services> (accessed 20 Nov 2016).
3. Cadogan SL, Browne JP, Bradley CP, et al. The effectiveness of interventions to improve laboratory requesting patterns among primary care physicians: a systematic review. *Implement Sci* 2015;10(1):167.
4. Newman-Toker DE, McDonald KM, Meltzer DO, et al. How much diagnostic safety can we afford, and how should we decide? A health economics perspective. *BMJ Qual Saf* 2013;22: ii11-ii20.
5. Department of Health. Report of the review of NHS pathology services in England: an independent review for the Department of Health. 2006. Available from: [http://collection.europarchive.org/tna/20070706124823/http://dh.gov.uk/en/Publicationsandstatistics/Publications/PublicationsPolicyAndGuidance/DH\\_4137606](http://collection.europarchive.org/tna/20070706124823/http://dh.gov.uk/en/Publicationsandstatistics/Publications/PublicationsPolicyAndGuidance/DH_4137606) (accessed 14 Nov 2016).
6. Furness P. Roundtable pathology. *Health Service Journal Pathology* 2011; 3:3.

7. Weydert JA, Nobbs ND, Feld R, et al. A simple, focused, computerized query to detect overutilization of laboratory tests. *Arch Pathol Lab Med* 2005;129(9):1141-1143.
8. Wong ET, McCarron MM, Shaw ST. Ordering of laboratory tests in a teaching hospital: can it be improved? *JAMA* 1983;249(22):3076-3080.
9. Young DW. Improving laboratory usage: a review. *Postgrad Med J* 1988;64(750):283-289.
10. Epstein AM, McNeil BJ. Relationship of beliefs and behavior in test ordering. *Am J Med* 1986; 80:865–870.
11. van der Weijden TR, Grol RP, Knottnerus JA. Feasibility of a national cholesterol guideline in daily practice. A randomized controlled trial in 20 general practices. *Int J Qual Health Care* 1999;11(2):131-137.
12. Thakkar RN, Kim D, Knight AM, et al. Impact of an educational intervention on the frequency of daily blood test orders for hospitalized patients. *Am J Clin Pathol* 2015;143(3):393-397.
13. Solomon DH, Hashimoto H, Daltroy L, et al. Techniques to improve physicians' use of diagnostic tests: a new conceptual framework. *JAMA* 1998;280(23):2020-2027.
14. Borgiel AE, Williams JI, Davis DA, et al. Evaluating the effectiveness of 2 educational interventions in family practice. *CMAJ* 1999;161(8):965-970.
15. ESMO minimum clinical recommendations for diagnosis, treatment and follow-up of advanced colorectal cancer. *Ann Oncol* 2001;12:1055.



16. Bugter-Maessen AM, Winkens RA, Grol RP, et al. Factors predicting differences among general practitioners in test ordering behaviour and in the response to feedback on test requests. *Fam Pract* 1996;13: 254–258.
17. Baker R, Falconer Smith J, Lambert PC. Randomised controlled trial of the effectiveness of feedback in improving test ordering in general practice. *Scand J Prim Health Care* 2003;21(4):219-223.
18. Buntinx F, Knottnerus JA, Crebolder HF, et al. Reactions of doctors to various forms of feedback designed to improve the sampling quality of cervical smears. *Qual Assur Health Care* 1992;4(2):161-166.
19. Bunting PS, Van Walraven C. Effect of a controlled feedback intervention on laboratory test ordering by community physicians. *Clin Chem* 2004;50(2):321-326.
20. Showstack JA, Schroeder SA, Matsumoto MF. Changes in the use of medical technologies, 1972–1977: a study of 10 inpatient diagnoses. *N Engl J Med* 1982; 306: 706–712.
21. Alonso-Cerezo MC, Martín JS, García Montes MA, et al. Appropriate utilization of clinical laboratory tests. *Clin Chem Lab Med* 2009;47(12):1461-1465.
22. Driskell OJ, Holland D, Hanna FW, et al. Inappropriate requesting of glycosylated hemoglobin (HbA1c) is widespread: assessment of prevalence, impact of national guidance, and practice-to-practice variability. *Clin Chem* 2012;58(5):906-915.

23. Schroeder SA, Myers LP, McPhee SJ, et al. The failure of physician education as a cost containment strategy: report of a prospective controlled trial at a university hospital. *JAMA* 1984;252(2):225-230.
24. Northern Ireland Statistics and Research Agency. Review of the Statistical Classification and Delineation of Settlements. 2015. Available from: <http://www.nisra.gov.uk/archive/geography/review-of-the-statistical-classification-and-delineation-of-settlements-march-2015.pdf> (accessed 26 Oct 2016).
25. Bonett DG, Seier E. Statistical inference for a ratio of dispersions using paired samples. *J Educ Behav Stat* 2003;28: 21-30.
26. Walters SJ. Quality of life outcomes in clinical trials and health-care evaluation: a practical guide to analysis and interpretation. John Wiley & Sons 2009.
27. Salinas M, López-Garrigós M, Uris J, Leiva-Salinas C, Pilot Group of the Appropriate Utilization of Laboratory Tests (REDCONLAB) working group. A study of the differences in the request of glycated hemoglobin in primary care in Spain: A global, significant, and potentially dangerous under-request. *Clinical biochemistry*. 2014 Aug 31;47(12):1104-7.
28. Boerma WG, Groenewegen PP, Van der Zee J. General practice in urban and rural Europe: the range of curative services. *Soc Sci Med* 1998;47(4):445-453.
29. National Collaborating Centre for Chronic Conditions. Type 2 Diabetes: National Clinical Guidelines for Management in Primary and Secondary Care [update]. Royal College of Physicians, 2008.

30. van Wijk MA, van der Lei J, Mosseveld M, et al. Compliance of general practitioners with a guideline-based decision support system for ordering blood tests. *Clin Chem* 2002; 48: 55-60.
31. Verstappen WH, van der Weijden T, Sijbrandij J, et al. Effect of a practice-based strategy on test ordering performance of primary care physicians. *JAMA* 2003; 289: 2407-2411.
32. Hobbs FD, Delaney BC, Carson A, et al. A prospective controlled trial of computerized decision support for lipid management in primary care. *Fam Pract* 1996; 13: 133-137.
33. Holbrook A, Thabane L, Keshavjee K, et al. Individualized electronic decision support and reminders to improve diabetes care in the community: COMPETE II randomized trial. *CMAJ* 2009;181(1-2):37–44.
34. Claes N, Buntinx F, Vijgen J, et al. The Belgian improvement study on oral anticoagulation therapy: a randomized clinical trial. *Eur Heart J* 2005; 26: 2159-2165.
35. Hutton HD, Drummond HS, Fryer AA. The rise and fall of C-reactive protein: managing demand within clinical biochemistry. *Ann Clin Biochem* 2009; 46: 155-158.
36. Eccles M, Grimshaw J, Steen N, et al. The design and analysis of a randomized controlled trial to evaluate computerized decision support in primary care: The COGENT study. *Fam Pract* 2000; 17: 180-186.
37. Eccles M, McColl E, Steen N, et al. Effect of computerised evidence based guidelines on management of asthma and angina in adults in primary care: cluster randomised controlled trial. *BMJ* 2002; 325.

38. Hetlevik I, Holmen J, Kruger O, et al. Implementing clinical guidelines in the treatment of diabetes mellitus in general practice. Evaluation of effort, process, and patient outcome related to implementation of a computer-based decision support system. *Int J Technol Assess Health Care* 2000; 16: 210-227.
39. Moher M, Yudkin P, Wright L, et al. Cluster randomised controlled trial to compare three methods of promoting secondary prevention of coronary heart disease in primary care. *BMJ* 2001; 322: 1338.
40. Winkens RA, Pop P, Bugter-Maessen AM, et al. Randomised controlled trial of routine individual feedback to improve rationality and reduce numbers of test requests. *Lancet* 1995; 345: 498-502.
41. Bindels R, Hasman A, Kester AD, et al. The efficacy of an automated feedback system for general practitioners. *Inform Prim Care* 2003; 11: 69-74.
42. O'Kane MJ, Casey L, Lynch PM, et al. Clinical outcome indicators, disease prevalence and test request variability in primary care. *Ann Clin Biochem* 2011; 48(2): 155-158.
43. Smellie WSA, Galloway MJ, Chinn D. Is clinical practice variability the major reason for differences in pathology requesting patterns in general practice? *J Clin Pathol* 2002; 55: 312-314.

**Figure 1.** Practice standardized requests for electrolyte profiles plotted against liver profiles (A), and lipid profiles plotted against liver profiles (B), with Spearman's rank correlation coefficients (R).

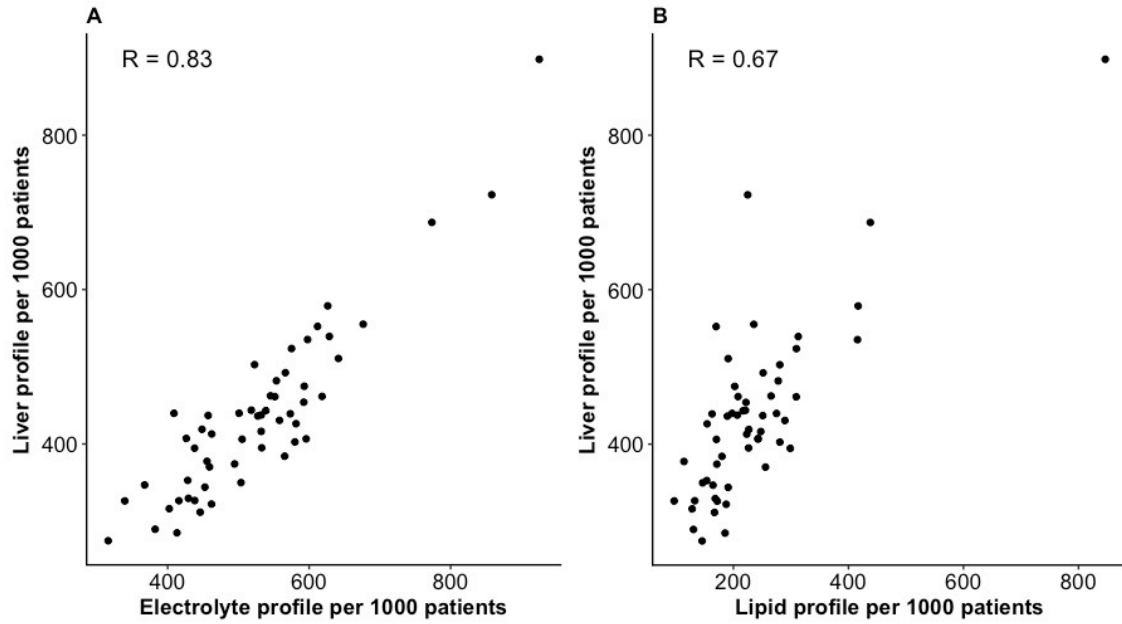

**Table 1.** Standardised profile test request rates per 1 000 patients pre- and post-intervention for all practices combined and for rural and urban practices. T-test p-value refers to the significance level evaluating differences between the mean number of request rates in pre- and post-intervention period. The p-value of Bonett-Seier test refers to the significance level assessing the difference in variances in pre- and post-intervention period. Asterisk: Statistically significant difference ( $p < 0.05$ ) between the pre- and post-intervention data.

| Year                               | Pre-intervention |             | Intervention |             | Post-intervention |
|------------------------------------|------------------|-------------|--------------|-------------|-------------------|
|                                    | 2011-2012        | 2012-2013   | 2013-2014    | 2014-2015   | 2015-2016         |
| <b>All</b>                         |                  |             |              |             |                   |
| Mean                               | 1554             | 1556        | 1499         | 1485        | 1498              |
| (Range)                            | (798-3919)       | (809-4043)  | (879-3918)   | (868-3840)  | (942-3530)        |
| Between practice CV (%)            | <b>30.2</b>      | <b>30.1</b> | <b>29.5</b>  | <b>29.4</b> | <b>27.4</b>       |
| <i>p-value (t-test)</i>            | 0.09             |             |              |             |                   |
| <i>p-value (Bonett-Seier test)</i> | 0.049*           |             |              |             |                   |
| <b>Rural</b>                       |                  |             |              |             |                   |
| Mean                               | 1720             | 1726        | 1604         | 1581        | 1566              |
| (Range)                            | (998-3919)       | (1112-4043) | (1139-3918)  | (868-3840)  | (1073-3530)       |
| Between practice CV (%)            | <b>32.1</b>      | <b>32.0</b> | <b>34.5</b>  | <b>34.6</b> | <b>31.4</b>       |
| <i>p-value (t-test)</i>            | 0.01*            |             |              |             |                   |
| <i>p-value (Bonett-Seier test)</i> | 0.2              |             |              |             |                   |
| <b>Urban</b>                       |                  |             |              |             |                   |
| Mean                               | 1426             | 1424        | 1418         | 1410        | 1444              |
| (Range)                            | (798-2543)       | (809-2356)  | (879-2205)   | (893-2297)  | (942-2368)        |
| Between practice CV (%)            | <b>24.7</b>      | <b>24.3</b> | <b>22.6</b>  | <b>22.5</b> | <b>23.2</b>       |
| <i>p-value (t-test)</i>            | 0.6              |             |              |             |                   |
| <i>p-value (Bonett-Seier test)</i> | 0.4              |             |              |             |                   |

**Table 2.** Standardised test request rates pre- and post-intervention for HbA<sub>1c</sub> (expressed as number of tests per patient with diabetes). Asterisk: Statistically significant difference ( $p < 0.05$ ) between the pre- and post-intervention data.

| Year                               | Pre-intervention |             | Intervention |             | Post-intervention |
|------------------------------------|------------------|-------------|--------------|-------------|-------------------|
|                                    | 2011-2012        | 2012-2013   | 2013-2014    | 2014-2015   | 2015-2016         |
| <b>All</b>                         |                  |             |              |             |                   |
| Mean                               | 1.86             | 2.04        | 2.32         | 2.60        | 3.01              |
| (Range)                            | (1.07-3.07)      | (1.09-3.43) | (1.33-4.59)  | (1.49-5.94) | (1.71-8.06)       |
| Between practice CV (%)            | <b>23.8</b>      | <b>26.2</b> | <b>33.2</b>  | <b>34.9</b> | <b>36.6</b>       |
| <i>p-value (t-test)</i>            | $< 0.0000001^*$  |             |              |             |                   |
| <i>p-value (Bonett-Seier test)</i> | $0.00001^*$      |             |              |             |                   |
| <b>Rural</b>                       |                  |             |              |             |                   |
| Mean                               | 1.93             | 2.07        | 2.33         | 2.77        | 3.21              |
| (Range)                            | (1.39-3.01)      | (1.30-3.07) | (1.40-4.59)  | (1.62-5.94) | (1.71-8.06)       |
| Between practice CV (%)            | <b>23.0</b>      | <b>24.7</b> | <b>34.2</b>  | <b>42.1</b> | <b>45.1</b>       |
| <i>p-value (t-test)</i>            | $0.0002$         |             |              |             |                   |
| <i>p-value (Bonett-Seier test)</i> | $0.00031^*$      |             |              |             |                   |
| <b>Urban</b>                       |                  |             |              |             |                   |
| Mean                               | 1.80             | 2.03        | 2.31         | 2.47        | 2.86              |
| (Range)                            | (798-2543)       | (809-2356)  | (879-2205)   | (893-2297)  | (942-2368)        |
| Between practice CV (%)            | <b>24.4</b>      | <b>27.6</b> | <b>33.0</b>  | <b>25.5</b> | <b>25.3</b>       |
| <i>p-value (t-test)</i>            | $< 0.0000001^*$  |             |              |             |                   |
| <i>p-value (Bonett-Seier test)</i> | $0.008^*$        |             |              |             |                   |

**Table 3.** Standardised test request rates pre- and post-intervention for PSA (expressed as number of tests per 1 000 male patients). Asterisk: Statistically significant difference ( $p < 0.05$ ) between the pre- and post-intervention data.

| Year                               | Pre-intervention |              | Intervention |              | Post-intervention |
|------------------------------------|------------------|--------------|--------------|--------------|-------------------|
|                                    | 2011-2012        | 2012-2013    | 2013-2014    | 2014-2015    | 2015-2016         |
| <b>All</b>                         |                  |              |              |              |                   |
| Mean                               | 69.4             | 79.2         | 79.6         | 74.8         | 82.9              |
| (Range)                            | (19.6-279.3)     | (19.9-396.1) | (23.1-527.6) | (17.1-274.0) | (26.4-296.9)      |
| Between practice CV                | <b>67.5</b>      | <b>78.9</b>  | <b>90.2</b>  | <b>62.7</b>  | <b>65.7</b>       |
| <i>p-value (t-test)</i>            | 0.006*           |              |              |              |                   |
| <i>p-value (Bonett-Seier test)</i> | 0.60             |              |              |              |                   |
| <b>Rural</b>                       |                  |              |              |              |                   |
| Mean                               | 87.4             | 101.9        | 103.1        | 93.4         | 106.8             |
| (Range)                            | (29.7-279.3)     | (35.5-396.1) | (27.8-527.6) | (38.5-274.0) | (35.7-296.9)      |
| Between practice CV                | <b>66.6</b>      | <b>80.0</b>  | <b>97.4</b>  | <b>64.1</b>  | <b>65.2</b>       |
| <i>p-value (t-test)</i>            | 0.08             |              |              |              |                   |
| <i>p-value (Bonett-Seier test)</i> | 0.72             |              |              |              |                   |
| <b>Urban</b>                       |                  |              |              |              |                   |
| Mean                               | 55.4             | 61.6         | 61.4         | 60.3         | 64.4              |
| (Range)                            | (19.6-134.6)     | (19.9-170.9) | (23.1-125.8) | (17.1-129.8) | (26.4-132.8)      |
| CV                                 | <b>53.9</b>      | <b>56.1</b>  | <b>45.2</b>  | <b>44.0</b>  | <b>43.9</b>       |
| <i>p-value (t-test)</i>            | 0.002*           |              |              |              |                   |
| <i>p-value (Bonett-Seier test)</i> | 0.98             |              |              |              |                   |
